# Supplementary material for: Insights into trait-association of selection signatures and adaptive eQTL in indigenous African cattle
Source: PubMed Central journal article supplement (PMC11490109; doi:10.1186/s12864-024-10852-8), 2024-10-19

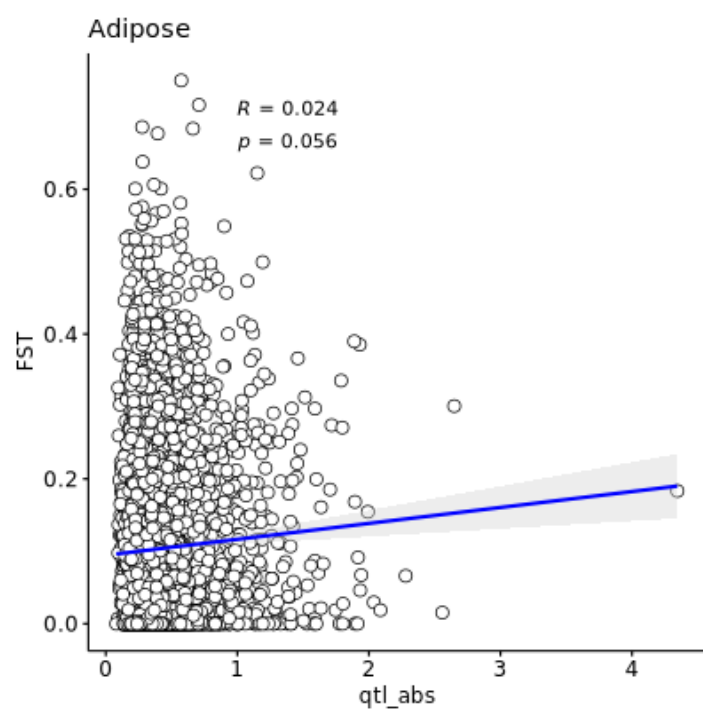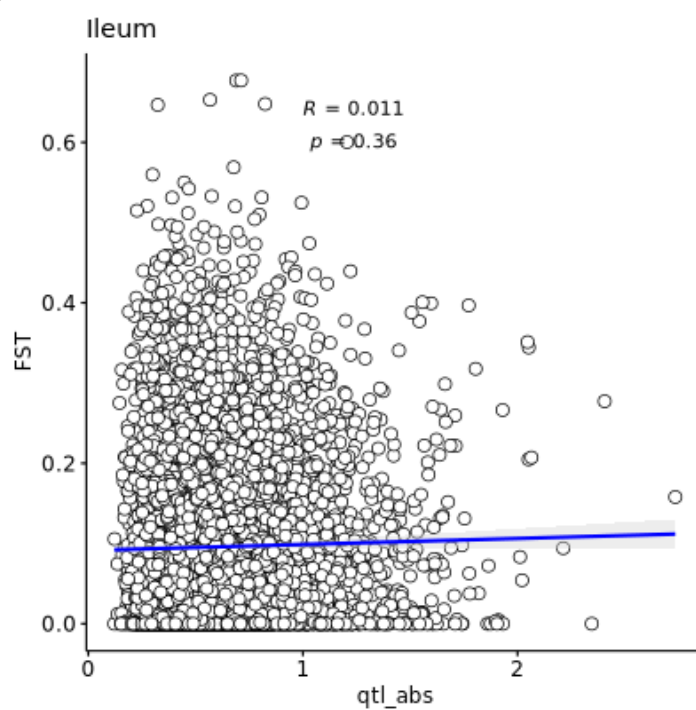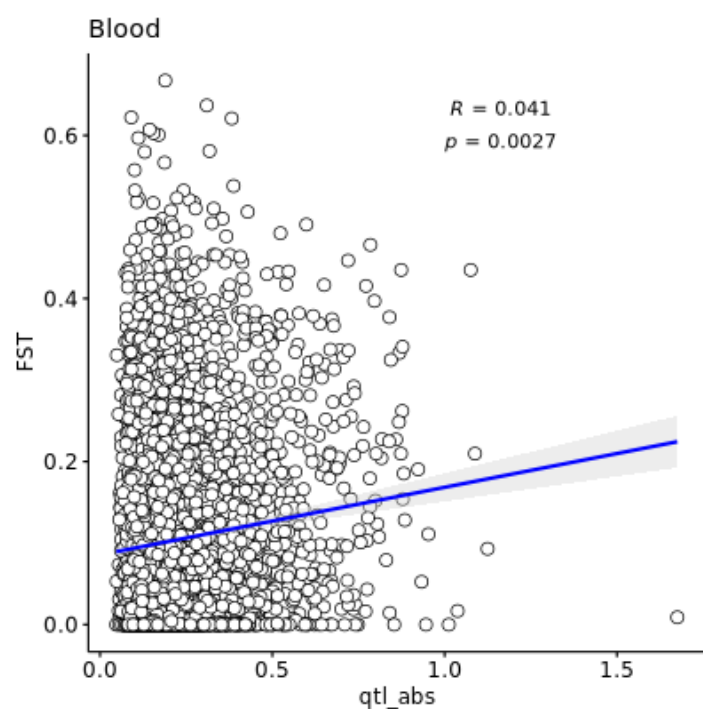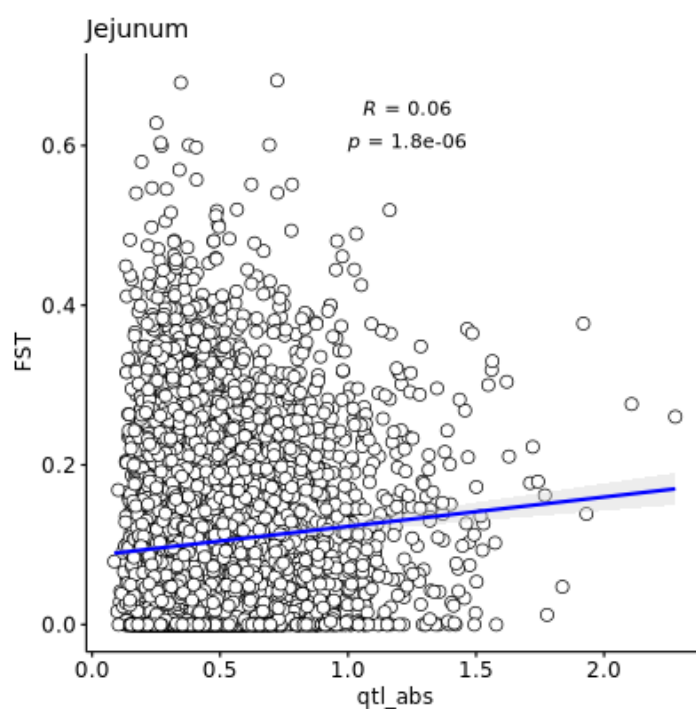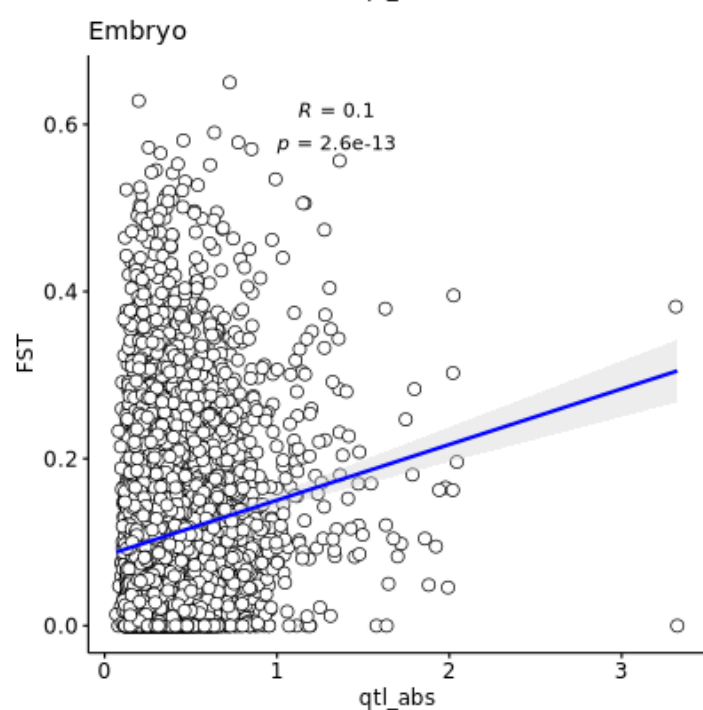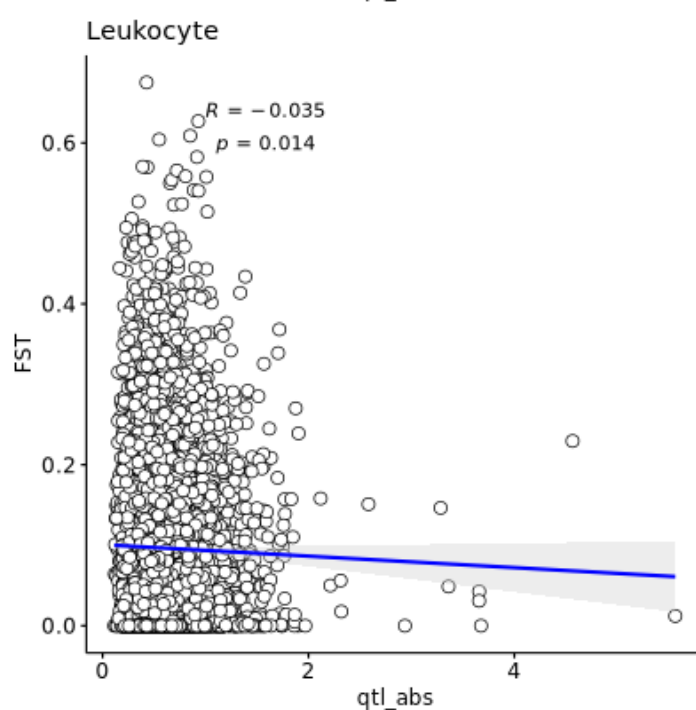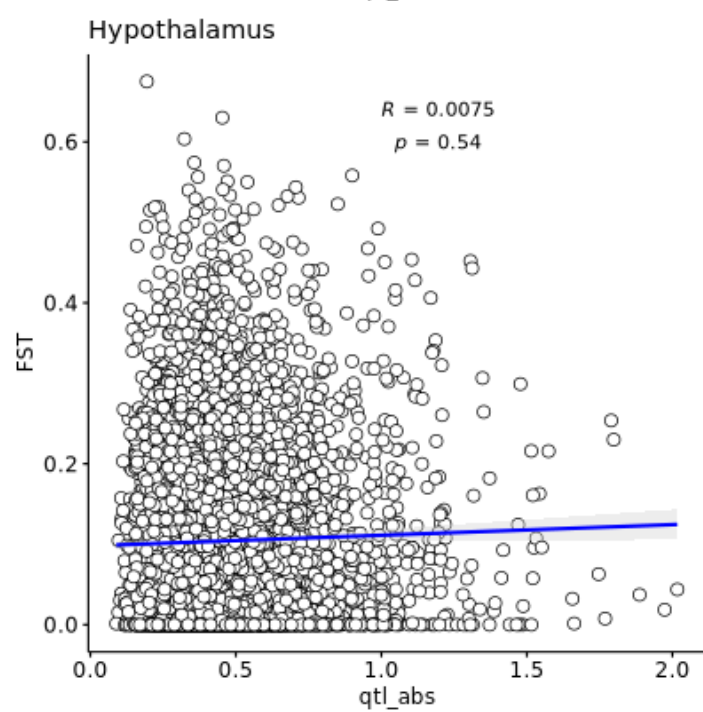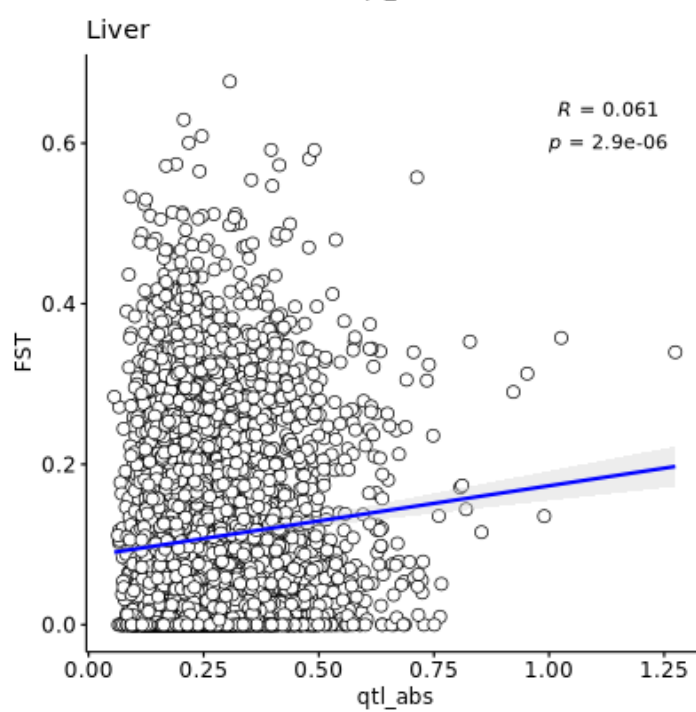

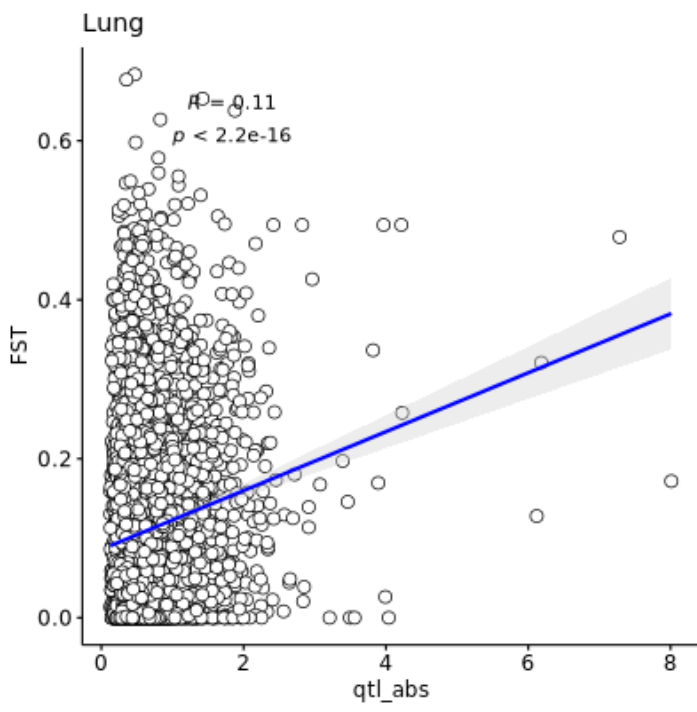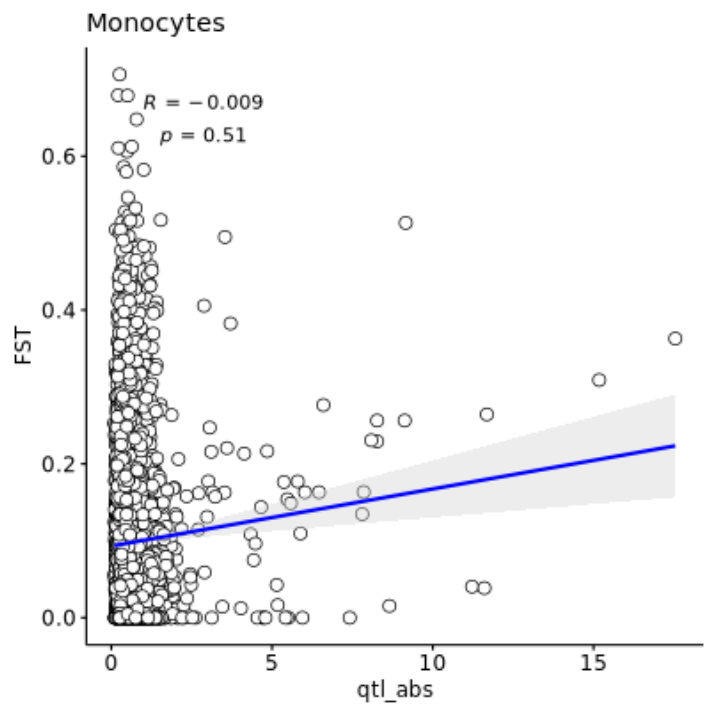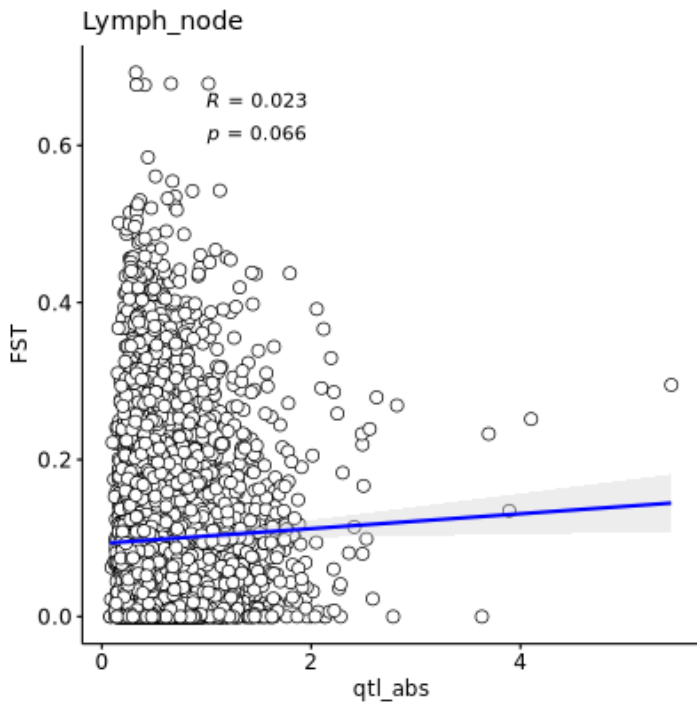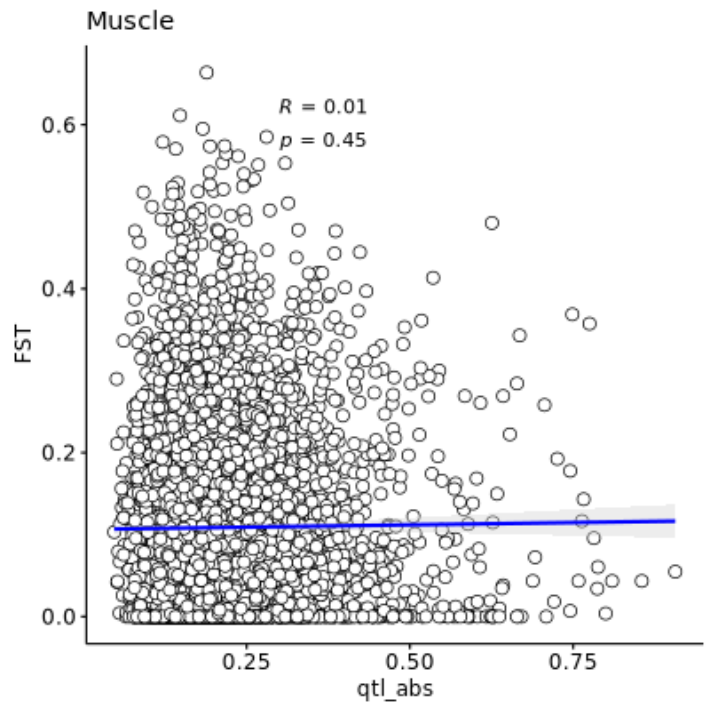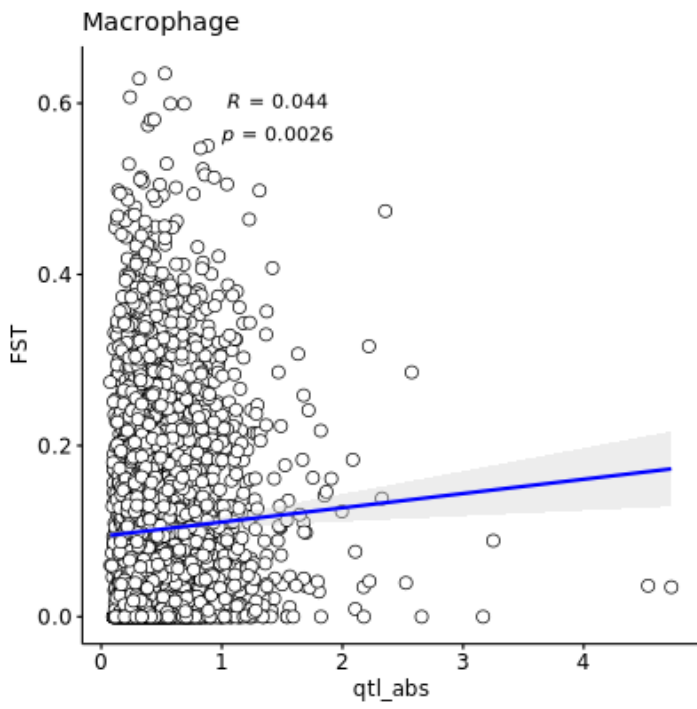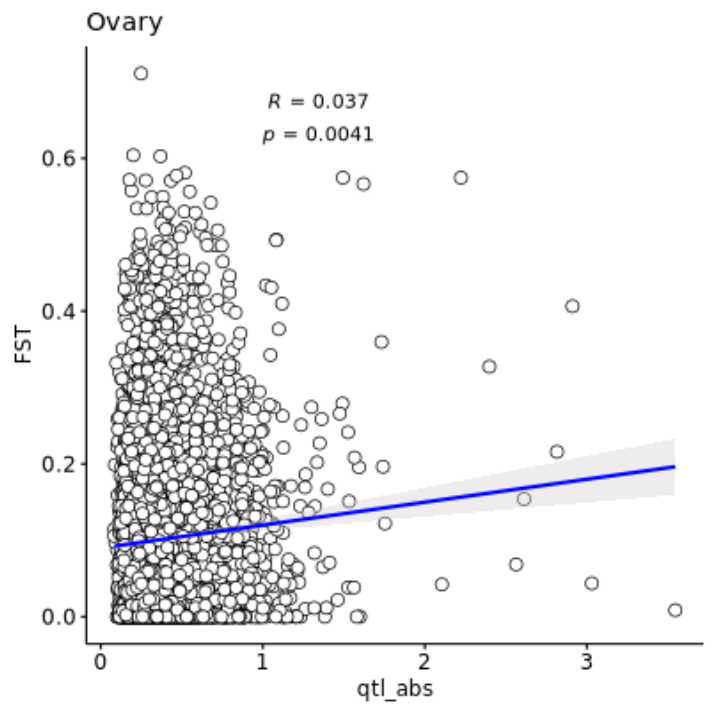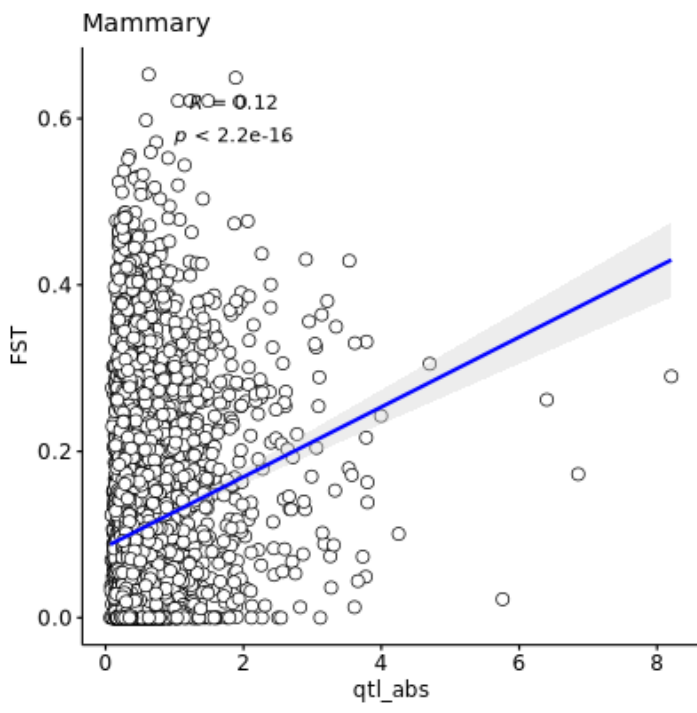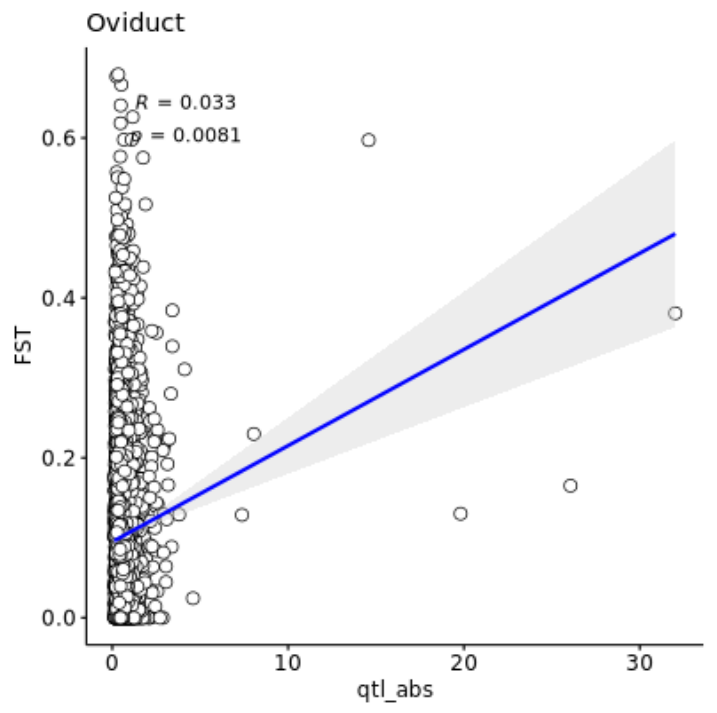



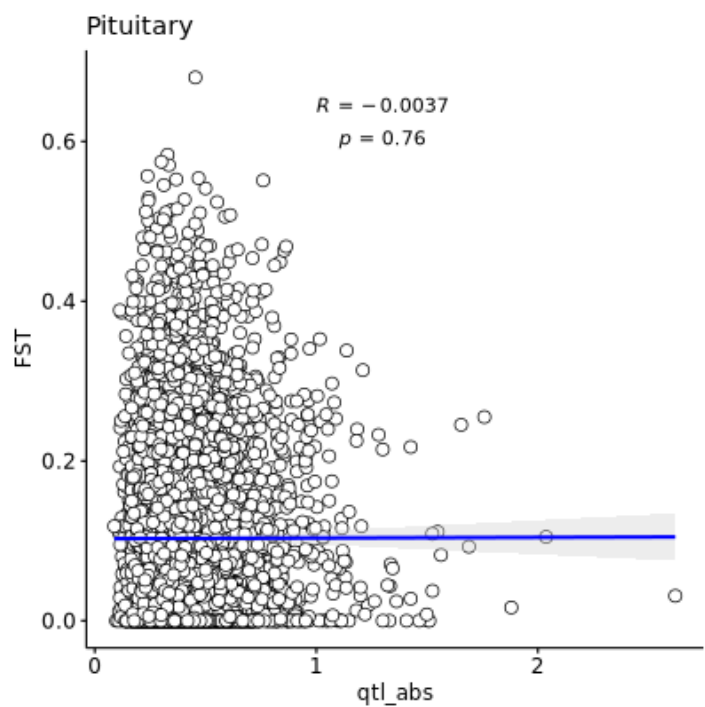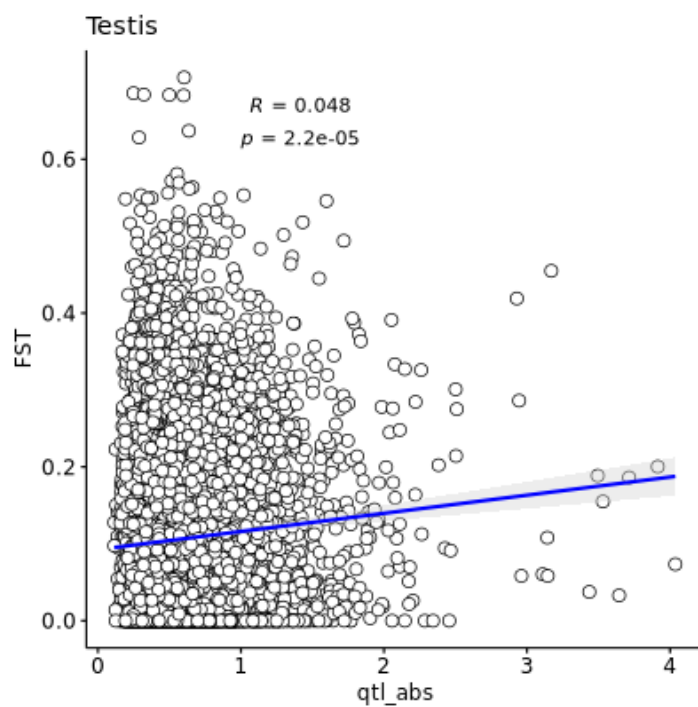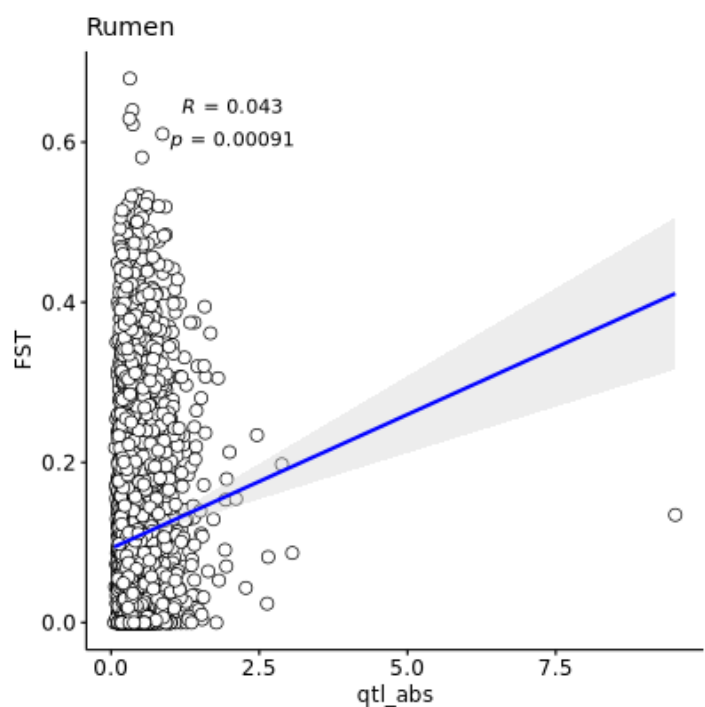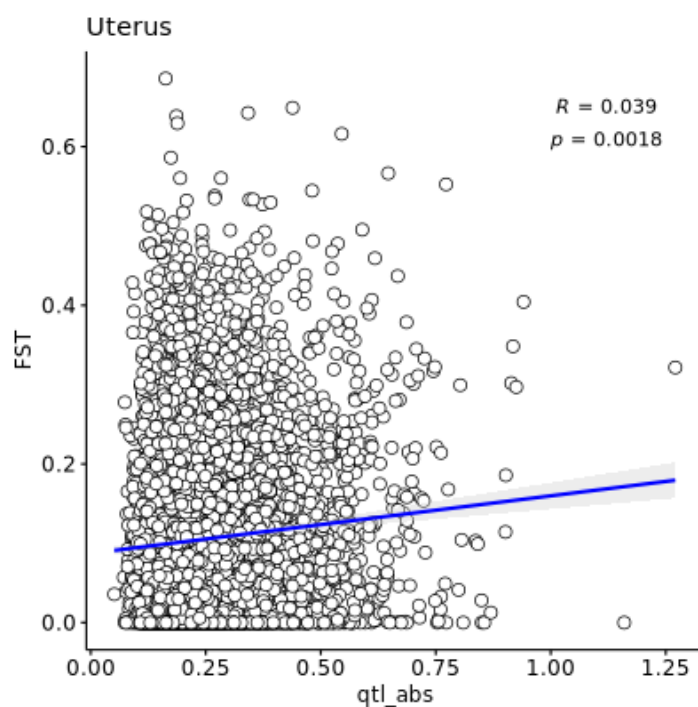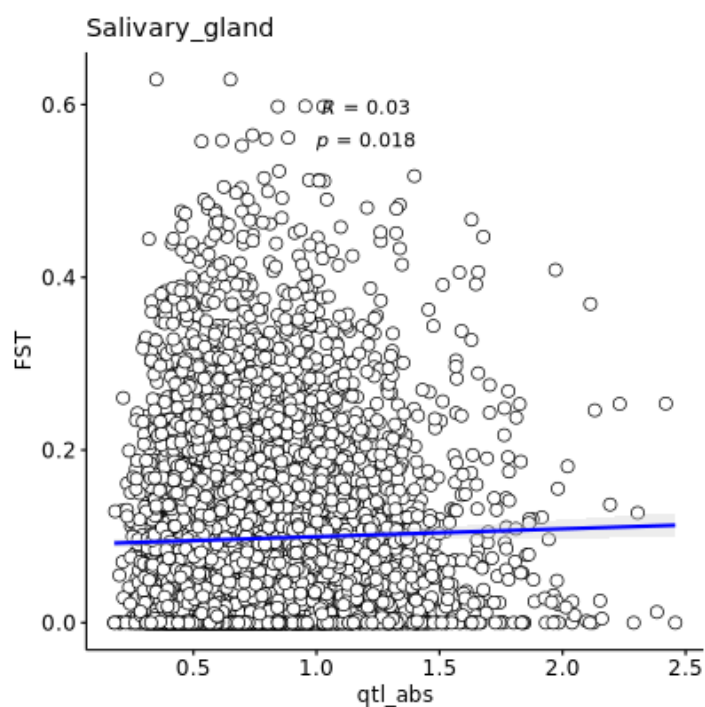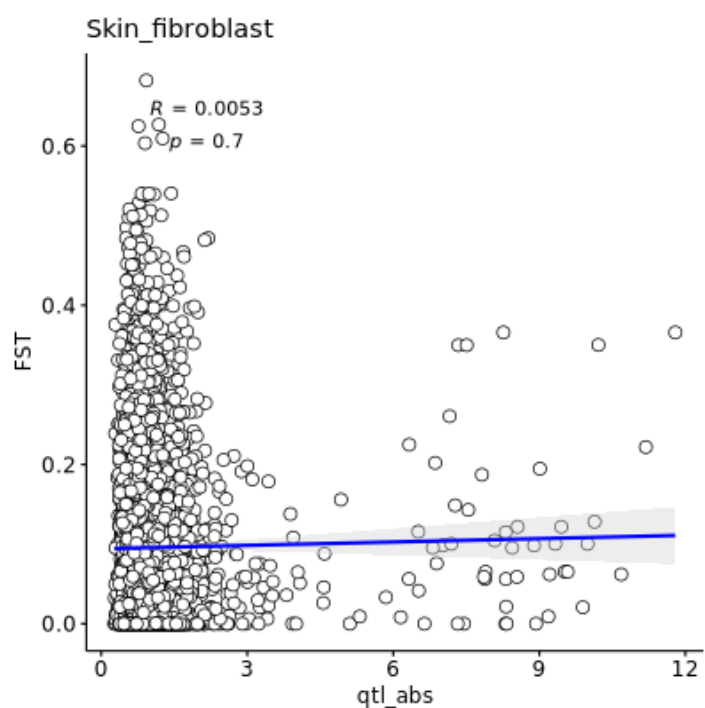

Supplement: 12864_2024_10852_MOESM5_ESM.pdf [file 12864_2024_10852_MOESM5_ESM.pdf]
